# Supplementary material for: Selective recognition of fluoride and acetate by a newly designed ruthenium framework: experimental and theoretical investigations
Source: Royal Society of Chemistry journal article supplement (doi:10.1039/c2dt12126c), 2012-01-01
Supplement: c2dt12126c.pdf [file c2dt12126c.pdf]

## **Electronic Supporting Information**

### **Selective recognition of fluoride and acetate by the newly designed ruthenium framework. Experimental and theoretical investigations**

Tanaya Kundu,<sup>a</sup> Abhishek Dutta Chowdhury,<sup>a</sup> Dipanwita De,<sup>a</sup> Shaikh M Mobin,<sup>a</sup>  
Vedavati G. Puranik,<sup>b</sup> Anindya Datta\*<sup>a</sup> and Goutam Kumar Lahiri\*<sup>a</sup>

<sup>a</sup>*Department of Chemistry, Indian Institute of Technology Bombay, Powai, Mumbai-400076, India. E-mail: [lahiri@chem.iitb.ac.in](mailto:lahiri@chem.iitb.ac.in)*

<sup>b</sup>*Center for Materials Characterization, National Chemical Laboratory, Dr. Homi Bhabha Road, Pune – 411008, India*

**Table S1** Selected bond lengths (Å) for H<sub>3</sub>L

|            | Bond lengths |       |
|------------|--------------|-------|
|            | X-ray        | DFT   |
| O(1)-C(1)  | 1.270(2)     | 1.326 |
| O(2)-C(1)  | 1.247(2)     | 1.220 |
| N(1)-C(3)  | 1.341(2)     | 1.357 |
| N(1)-C(2)  | 1.363(2)     | 1.374 |
| N(2)-C(3)  | 1.319(2)     | 1.320 |
| N(2)-C(4)  | 1.384(2)     | 1.376 |
| N(3)-C(5)  | 1.333(2)     | 1.322 |
| N(3)-C(11) | 1.395(2)     | 1.386 |
| N(4)-C(5)  | 1.335(2)     | 1.367 |
| N(4)-C(6)  | 1.392(2)     | 1.384 |
| C(1)-C(2)  | 1.491(2)     | 1.487 |
| C(2)-C(4)  | 1.387(2)     | 1.391 |
| C(4)-C(5)  | 1.443(2)     | 1.445 |
| C(6)-C(11) | 1.385(2)     | 1.418 |

**Table S2** Distances (Å) and angles (°) of hydrogen bonds in H<sub>3</sub>L

| Intramolecular      |     |         |          |          |          |
|---------------------|-----|---------|----------|----------|----------|
| D-H...A             |     | d(D-H)  | d(H...A) | d(D...A) | ∠D-H...A |
| N3-H3...O1          | (0) | 0.88    | 1.89     | 2.663(2) | 144      |
| Intermolecular      |     |         |          |          |          |
| D-H...A             |     | d(D-H)  | d(H...A) | d(D...A) | ∠D-H...A |
| O111-H111...O333(1) |     | 0.84(3) | 2.15(3)  | 2.956(3) | 164(3)   |
| O111-H222...O333(1) |     | 0.89(3) | 1.93(1)  | 2.805(2) | 168(2)   |
| O222-H555...O333(0) |     | 0.88(2) | 2.00(2)  | 2.871(2) | 177(2)   |
| O222-H666...N2      | (3) | 0.96(2) | 1.92(2)  | 2.861(2) | 164(2)   |
| O333-H333...O2      | (4) | 0.93(2) | 1.78(2)  | 2.697(2) | 171(2)   |
| O333-H444...O1      | (1) | 0.92(2) | 1.85(2)  | 2.716(2) | 158(2)   |
| N4-H4...O111        | (2) | 0.88    | 1.88     | 2.725(2) | 163      |

- (0) x,y,z  
 (1) -x+1,-y,-z+1  
 (2) x,+y,+z+1  
 (3) x,+y,+z-1  
 (4) x+1,+y,+z

**Table S3** Distances (Å) and angles (°) of hydrogen bonds in [1](ClO<sub>4</sub>)

| Intramolecular                    |        |          |           |          |
|-----------------------------------|--------|----------|-----------|----------|
| D-H...A                           | d(D-H) | d(H...A) | d(D...A)  | ∠D-H...A |
| N2-H2...O11                       | 0.88   | 1.87     | 2.739(11) | 172      |
| N3-H3...O2                        | 0.88   | 1.88     | 2.675(6)  | 149      |
| C3-H(3A)...O4                     | 0.95   | 2.38     | 3.291(15) | 160      |
| Intermolecular                    |        |          |           |          |
| D-H...A                           | d(D-H) | d(H...A) | d(D...A)  | ∠D-H...A |
| C(10)-H(10)...O(12) <sup>i</sup>  | 0.95   | 2.35     | 3.109(9)  | 137      |
| C(15)-H(15)...O(8) <sup>ii</sup>  | 0.95   | 2.59     | 3.534(9)  | 173      |
| C(18)-H(18)...O(8) <sup>iii</sup> | 0.95   | 2.55     | 3.472(8)  | 162      |

$i = 3/2-x, 1/2-y, 2-z$

$ii = 1/2+x, -1/2+y, 1+z$

$iii = 1/2+x, 1/2-y, 1/2+z$

**Table S4** Selected bond lengths (Å) and angles (°) for **1** (DFT: molecule 1 only)

| Bond lengths |          |       | Bond angles       |            |        |
|--------------|----------|-------|-------------------|------------|--------|
|              | X-ray    | DFT   |                   | X-ray      | DFT    |
| Ru(1)-N(5)   | 2.052(4) | 2.088 | N(6)-Ru(1)-N(8)   | 86.94(16)  | 96.23  |
| Ru(1)-N(6)   | 2.054(4) | 2.110 | N(6)-Ru(1)-N(7)   | 101.32(18) | 100.09 |
| Ru(1)-N(7)   | 2.037(4) | 2.069 | N(8)-Ru(1)-N(7)   | 78.78(16)  | 78.07  |
| Ru(1)-N(8)   | 2.023(4) | 2.094 | N(8)-Ru(1)-N(1)   | 98.49(16)  | 95.92  |
| Ru(1)-N(1)   | 2.054(4) | 2.064 | N(7)-Ru(1)-N(1)   | 85.23(15)  | 88.94  |
| Ru(1)-O(1)   | 2.103(3) | 2.085 | N(6)-Ru(1)-N(5)   | 78.71(15)  | 77.85  |
| Ru(2)-N(13)  | 2.049(4) |       | N(1)-Ru(1)-N(5)   | 94.74(18)  | 93.14  |
| Ru(2)-N(14)  | 2.047(4) |       | N(6)-Ru(1)-O(1)   | 97.00(14)  | 89.95  |
| Ru(2)-N(15)  | 2.018(4) |       | N(7)-Ru(1)-O(1)   | 93.26(15)  | 92.90  |
| Ru(2)-N(16)  | 2.032(4) |       | N(1)-Ru(1)-O(1)   | 78.34(14)  | 79.01  |
| Ru(2)-N(9)   | 2.061(4) |       | N(5)-Ru(1)-O(1)   | 86.76(14)  | 87.45  |
| Ru(2)-O(3)   | 2.111(3) |       | N(8)-Ru(1)-N(5)   | 101.20(16) | 101.74 |
| O(1)-C(1)    | 1.307(5) | 1.319 | N(6)-Ru(1)-N(1)   | 172.25(18) | 166.13 |
| O(2)-C(1)    | 1.214(6) | 1.242 | N(7)-Ru(1)-N(5)   | 180.0(2)   | 177.91 |
| O(3)-C(32)   | 1.282(5) |       | N(8)-Ru(1)-O(1)   | 171.71(15) | 169.81 |
| O(4)-C(32)   | 1.267(6) |       | O(1)-C(1)-O(2)    | 124.4(4)   | 121.62 |
| N(1)-C(3)    | 1.343(7) | 1.351 | N(15)-Ru(2)-N(16) | 79.73(16)  |        |
| N(1)-C(2)    | 1.350(6) | 1.379 | N(15)-Ru(2)-N(14) | 88.14(15)  |        |
| N(2)-C(4)    | 1.362(6) | 1.369 | N(16)-Ru(2)-N(14) | 101.03(18) |        |
| N(2)-C(3)    | 1.340(7) | 1.333 | N(15)-Ru(2)-N(13) | 100.70(15) |        |
| N(3)-C(5)    | 1.370(6) | 1.324 | N(14)-Ru(2)-N(13) | 78.60(15)  |        |
| N(3)-C(11)   | 1.369(6) | 1.380 | N(15)-Ru(2)-N(9)  | 97.71(15)  |        |
| N(4)-C(5)    | 1.315(6) | 1.380 | N(16)-Ru(2)-N(9)  | 85.75(15)  |        |
| N(4)-C(6)    | 1.384(7) | 1.374 | N(13)-Ru(2)-N(9)  | 94.59(18)  |        |
| N(9)-C(34)   | 1.334(7) |       | N(16)-Ru(2)-O(3)  | 93.37(14)  |        |
| N(9)-C(33)   | 1.361(6) |       | N(14)-Ru(2)-O(3)  | 97.14(14)  |        |
| N(10)-C(34)  | 1.363(7) |       | N(13)-Ru(2)-O(3)  | 86.23(14)  |        |
| N(10)-C(35)  | 1.371(6) |       | N(9)-Ru(2)-O(3)   | 77.67(14)  |        |
| N(11)-C(36)  | 1.379(6) |       | N(15)-Ru(2)-O(3)  | 172.04(14) |        |
| N(11)-C(42)  | 1.394(6) |       | N(14)-Ru(2)-N(9)  | 171.79(18) |        |
| N(12)-C(36)  | 1.335(6) |       | N(16)-Ru(2)-N(13) | 179.41(18) |        |
| N(12)-C(37)  | 1.381(6) |       | O(3)-C(32)-O(4)   | 120.9(4)   |        |
| C(1)-C(2)    | 1.511(6) | 1.478 |                   |            |        |
| C(4)-C(5)    | 1.465(7) | 1.457 |                   |            |        |
| C(2)-C(4)    | 1.379(7) | 1.408 |                   |            |        |
| C(6)-C(11)   | 1.415(7) | 1.423 |                   |            |        |
| C(32)-C(33)  | 1.457(7) |       |                   |            |        |
| C(33)-C(35)  | 1.405(7) |       |                   |            |        |
| C(35)-C(36)  | 1.435(7) |       |                   |            |        |
| C(37)-C(42)  | 1.399(7) |       |                   |            |        |

**Table S5** TD-DFT for **1<sup>+</sup>**

| State | Energy (eV) | $\lambda$ (nm) | $f^a$  | Transition                                 | Character                                                                                 |
|-------|-------------|----------------|--------|--------------------------------------------|-------------------------------------------------------------------------------------------|
| 5     | 2.75        | 450.22         | 0.1265 | HOMO-2→LUMO(0.52)<br>HOMO-2→LUMO+1 (0.20)  | Ru(d $\pi$ )→bpy( $\pi^*$ )                                                               |
| 6     | 2.92        | 424.02         | 0.0725 | HOMO-2→LUMO+2(0.45)                        | Ru(d $\pi$ )→bpy( $\pi^*$ )                                                               |
| 21    | 3.73        | 332.36         | 0.1056 | HOMO→LUMO+6(0.31)<br>HOMO-2→LUMO+3(0.30)   | Ru(d $\pi$ )/ H <sub>2</sub> L( $\pi^*$ )→bpy<br>( $\pi^*$ )/ H <sub>2</sub> L( $\pi^*$ ) |
| 28    | 3.97        | 312.32         | 0.7294 | HOMO-3→LUMO+2(0.56)<br>HOMO-2→LUMO+6(0.21) | Ru(d $\pi$ )/ H <sub>2</sub> L( $\pi^*$ )→bpy<br>( $\pi^*$ )/ H <sub>2</sub> L( $\pi^*$ ) |
| 40    | 4.49        | 275.88         | 0.5706 | HOMO-5→LUMO+1(0.35)<br>HOMO-6→LUMO(0.33)   | H <sub>2</sub> L ( $\pi^*$ )→bpy ( $\pi^*$ )                                              |

<sup>a</sup> Oscillator strength.

**Table S6** Selected molecular orbitals along with their energies and compositions of **A** (**1**<sup>+</sup> with F<sup>-</sup> in Scheme 1)

| M.O.   | Energy<br>(eV) | Composition (%) |     |                  |   |
|--------|----------------|-----------------|-----|------------------|---|
|        |                | Ru              | bpy | H <sub>2</sub> L | F |
| LUMO+5 | -1.388         | 2               | 97  | 1                | 0 |
| LUMO+4 | -1.429         | 3               | 97  | 0                | 0 |
| LUMO+3 | -1.514         | 7               | 92  | 1                | 0 |
| LUMO+2 | -1.754         | 2               | 97  | 1                | 0 |
| LUMO+1 | -2.475         | 9               | 90  | 1                | 0 |
| LUMO   | -2.541         | 6               | 93  | 1                | 0 |
| HOMO   | -4.524         | 5               | 2   | 93               | 0 |
| HOMO-1 | -5.048         | 1               | 0   | 99               | 0 |
| HOMO-2 | -5.399         | 68              | 12  | 20               | 0 |
| HOMO-3 | -5.450         | 67              | 14  | 19               | 0 |
| HOMO-4 | -5.556         | 63              | 15  | 22               | 0 |
| HOMO-5 | -5.860         | 6               | 2   | 92               | 0 |

**Table S7** TD-DFT for **A** (**1**<sup>+</sup> with F<sup>-</sup> in Scheme 1)

| State | Energy<br>(eV) | $\lambda$ (nm) | $f^a$  | Transition          | Character                                 |
|-------|----------------|----------------|--------|---------------------|-------------------------------------------|
| 5     | 2.5665         | 485.08         | 0.1628 | HOMO-2→LUMO(0.58)   | Ru(d $\pi$ )→bpy( $\pi^*$ )               |
| 6     | 2.7183         | 456.11         | 0.0636 | HOMO-2→LUMO+1(0.56) | Ru(d $\pi$ )→bpy( $\pi^*$ )               |
| 15    | 3.5080         | 353.44         | 0.1310 | HOMO-1→LUMO+4(0.35) | Ru(d $\pi$ )/ H <sub>2</sub> L( $\pi^*$ ) |
|       |                |                |        | HOMO→LUMO+3(0.26)   | →bpy( $\pi^*$ )                           |
| 21    | 3.6257         | 341.96         | 0.2670 | HOMO→LUMO+4(0.56)   | Ru(d $\pi$ )/ H <sub>2</sub> L( $\pi^*$ ) |
|       |                |                |        | HOMO-2→LUMO+5(0.21) | →bpy( $\pi^*$ )                           |

<sup>a</sup> Oscillator strength.



**Table S8** Selected molecular orbitals along with their energies and compositions for **B**  
(**1**<sup>+</sup> with OAc<sup>-</sup> in Scheme 1)

| M.O.   | Energy<br>(eV) | Composition (%) |     |                  |     |
|--------|----------------|-----------------|-----|------------------|-----|
|        |                | Ru              | bpy | H <sub>2</sub> L | OAc |
| LUMO+6 | -0.159         | 3               | 96  | 1                | 0   |
| LUMO+5 | -1.374         | 3               | 97  | 0                | 0   |
| LUMO+4 | -1.411         | 4               | 96  | 0                | 0   |
| LUMO+3 | -1.486         | 6               | 92  | 2                | 0   |
| LUMO+2 | -1.725         | 2               | 97  | 1                | 0   |
| LUMO+1 | -2.452         | 9               | 90  | 1                | 0   |
| LUMO   | -2.522         | 6               | 93  | 1                | 0   |
| HOMO   | -4.406         | 4               | 2   | 94               | 0   |
| HOMO-1 | -4.935         | 0               | 0   | 100              | 0   |
| HOMO-2 | -5.357         | 68              | 12  | 20               | 0   |
| HOMO-3 | -5.400         | 67              | 14  | 19               | 0   |

**Table S9** TD-DFT for **B** (**1**<sup>+</sup> with OAc<sup>-</sup> in Scheme 1)

| State | Energy (eV) | $\lambda$ (nm) | $f^a$  | Transition                               | Character                                                    |
|-------|-------------|----------------|--------|------------------------------------------|--------------------------------------------------------------|
| 5     | 2.5544      | 485.38         | 1633   | HOMO-2→LUMO(0.58)                        | Ru(d $\pi$ )→bpy( $\pi^*$ )                                  |
| 6     | 2.7066      | 458.08         | 0.0630 | HOMO-2→LUMO+1(0.56)                      | Ru(d $\pi$ )→bpy( $\pi^*$ )                                  |
| 16    | 3.5019      | 354.05         | 0.1004 | HOMO-1→LUMO+4(0.36)<br>HOMO→LUMO+4(0.24) | Ru(d $\pi$ )/ H <sub>2</sub> L( $\pi^*$ )<br>→bpy( $\pi^*$ ) |
| 21    | 3.6186      | 342.63         | 0.3417 | HOMO→LUMO+6(0.43)                        | Ru(d $\pi$ )/ H <sub>2</sub> L( $\pi^*$ )<br>→bpy( $\pi^*$ ) |

<sup>a</sup> Oscillator strength.

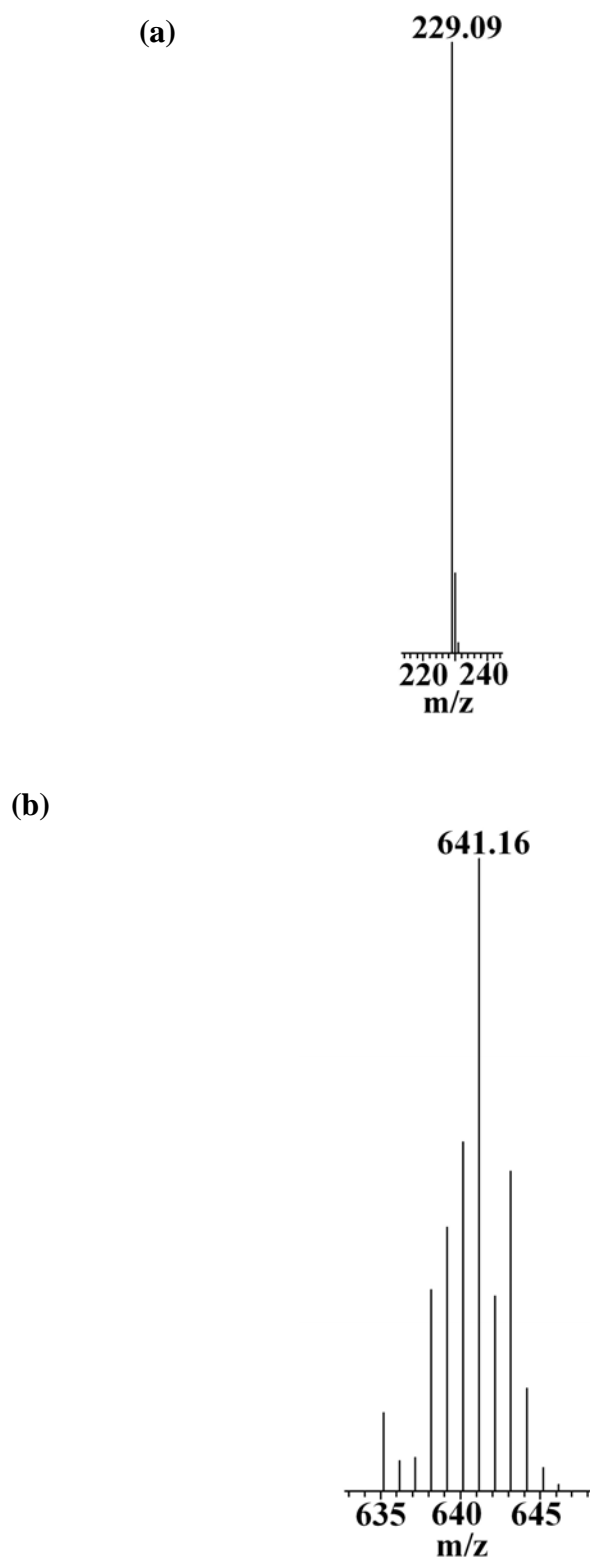

**Fig. S1** Mass spectra of (a) H<sub>3</sub>L in CH<sub>3</sub>OH and (b) [1](ClO<sub>4</sub>) in CH<sub>3</sub>CN.

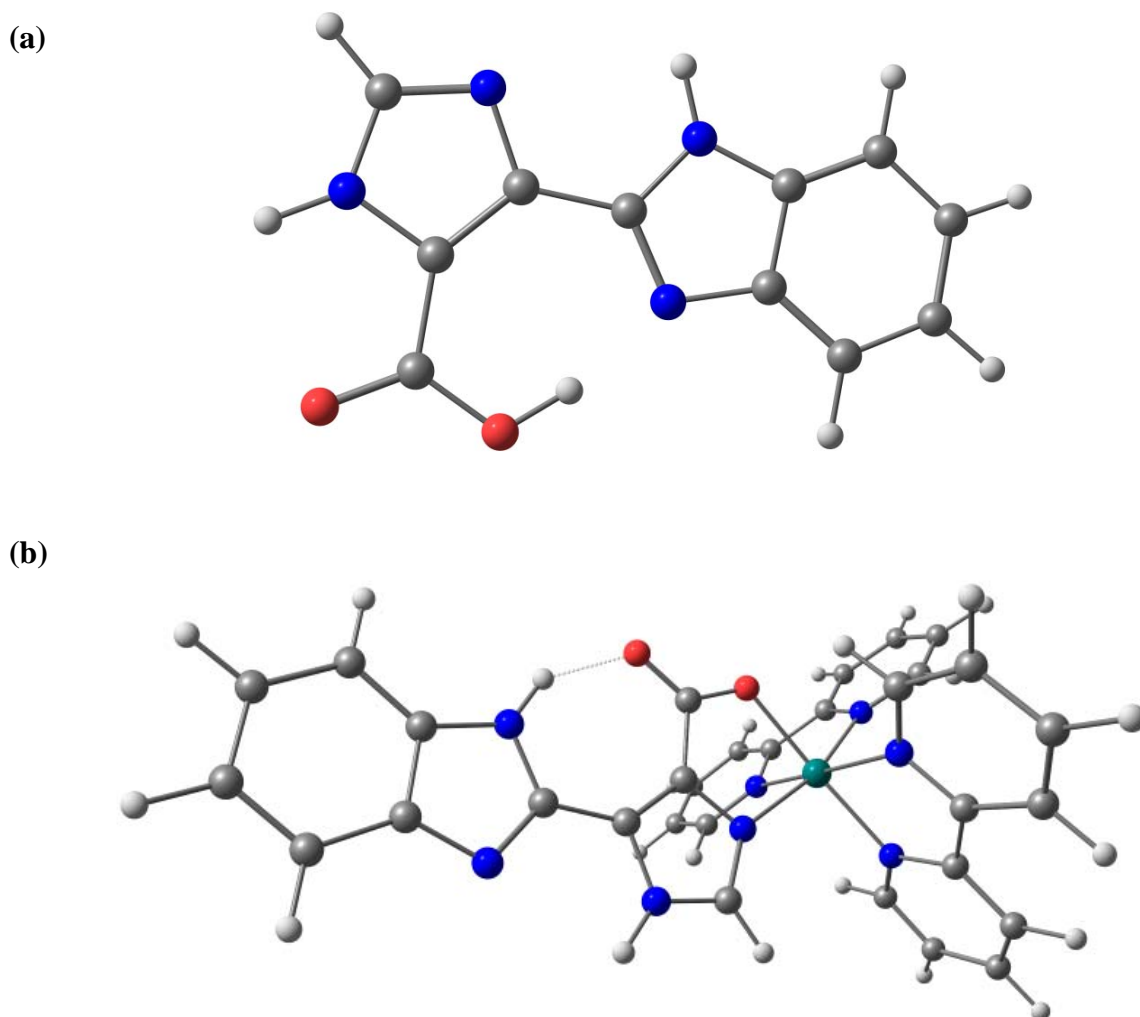

**Fig. S2** DFT optimised structures of (a)  $H_3L$  and (b)  $1^+$

(a)

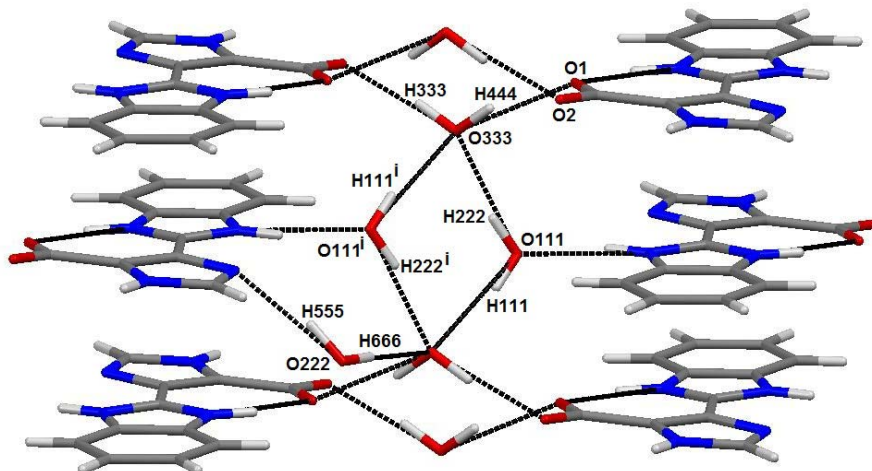

(b)

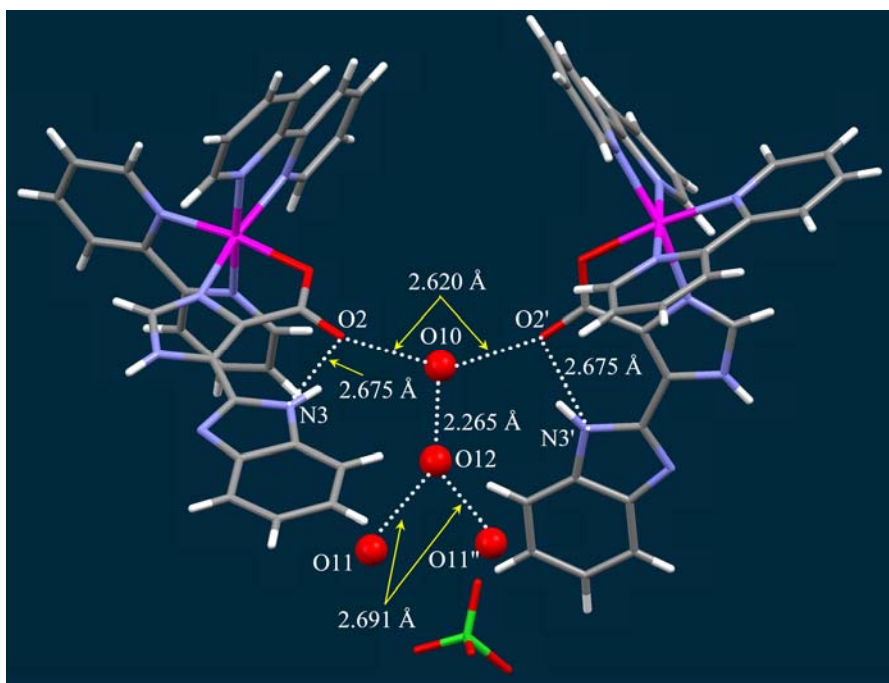

**Fig. S3** (a) Packing diagram of H<sub>3</sub>L along the *b*-axis with symmetry equivalent position, (i):  $-x+1, -y, -z+1$ . (b) Packing diagram of [1](ClO<sub>4</sub>) along the *c*-axis. Symmetry related atoms O2', N3' and O11'' are O2':  $2-x, y, 2.5-z$ ; N3':  $2-x, y, 2.5-z$ ; O11'':  $1-x, y, 1.5-z$ .

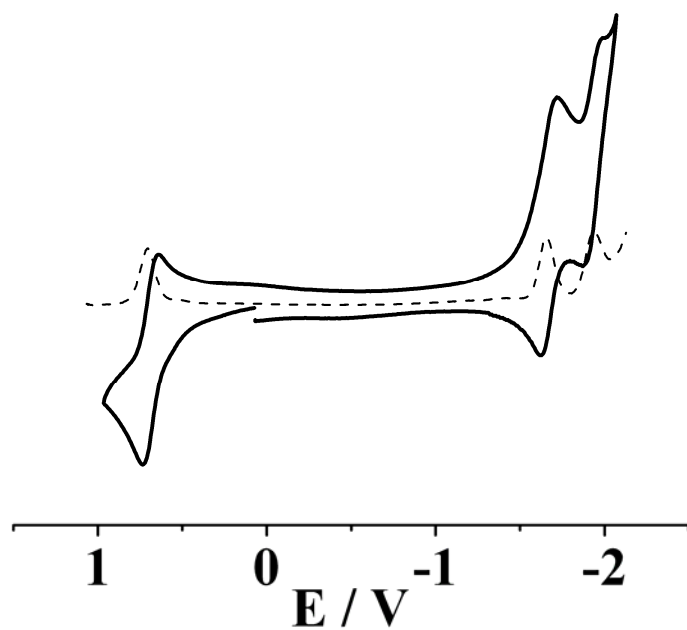

**Fig. S4** Cyclic (—) and differential pulse (-----) voltammograms of [1](ClO<sub>4</sub>) (10<sup>-3</sup> mol dm<sup>-3</sup>) versus SCE in CH<sub>3</sub>CN. Scan rate 100 mV s<sup>-1</sup>.

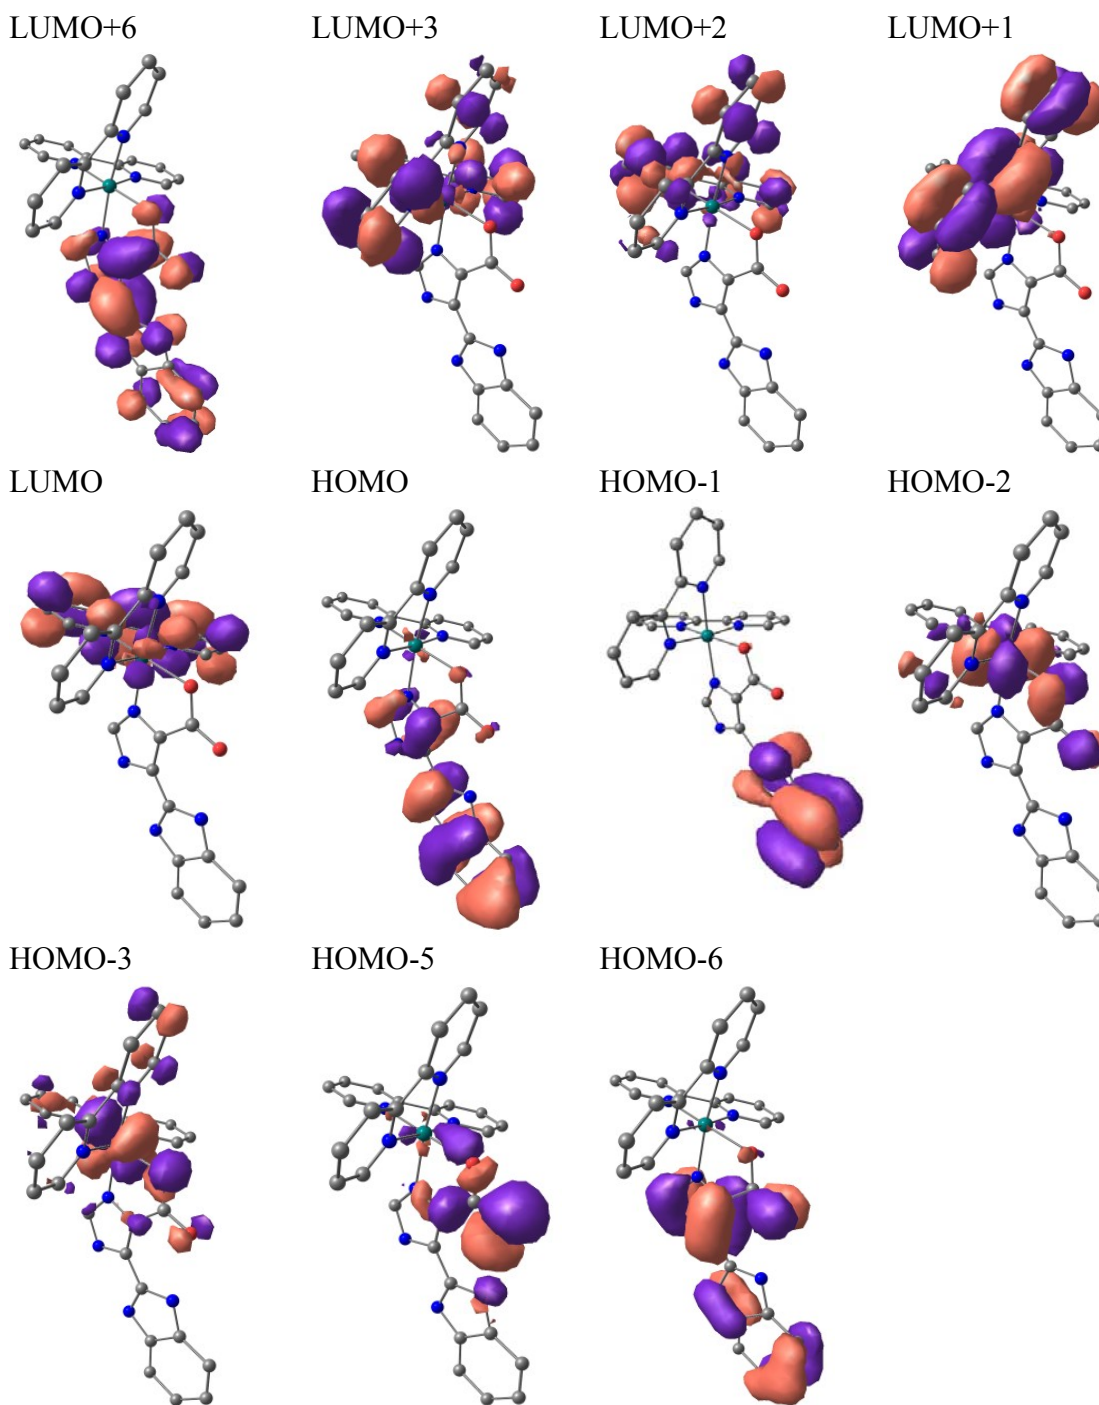

**Fig. S5** Selected molecular orbitals of  $1^+$ .

(a)

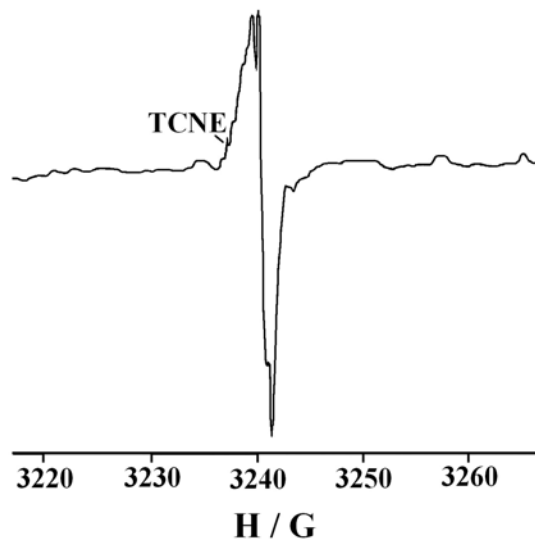

(b)

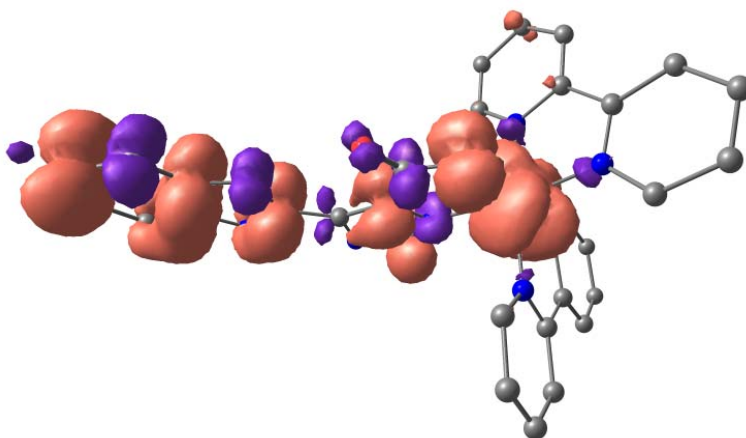

**Fig. S6** (a) EPR spectrum of the coulometrically generated oxidised species ( $1^{2+}$ ) at 110 K and (b) spin-density plot of  $1^{2+}$ .



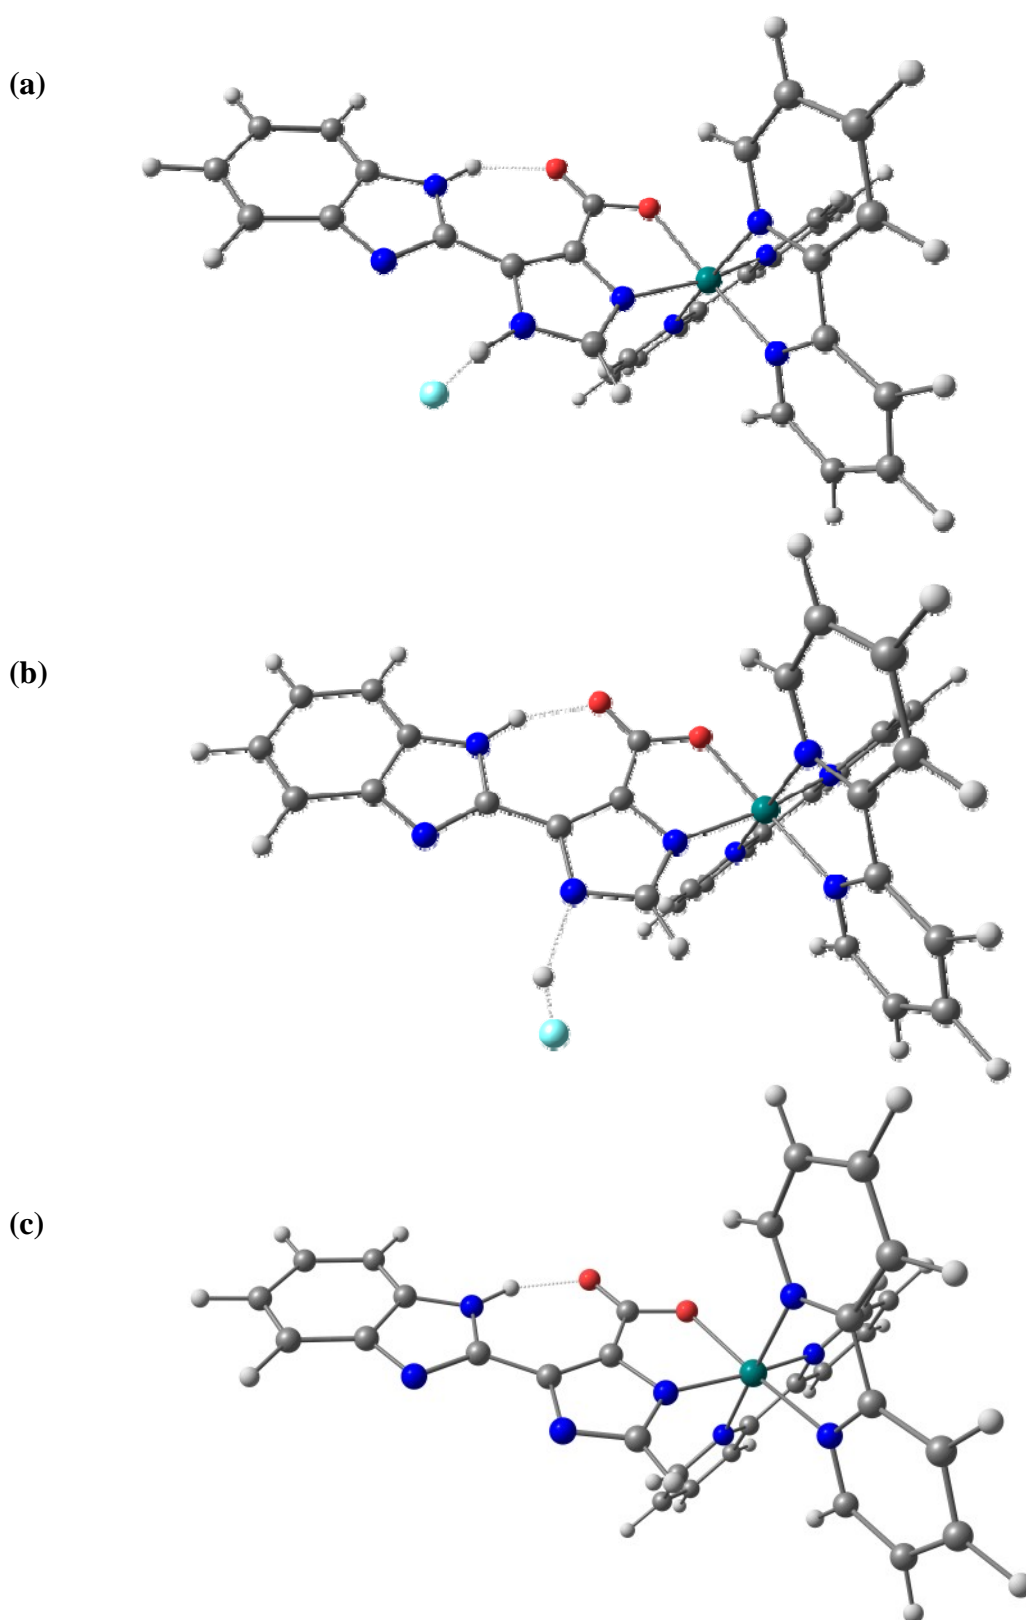

**Fig. S7** Molecular structures of (a) initial A, (b) DFT optimised A and (c) DFT optimised 1.

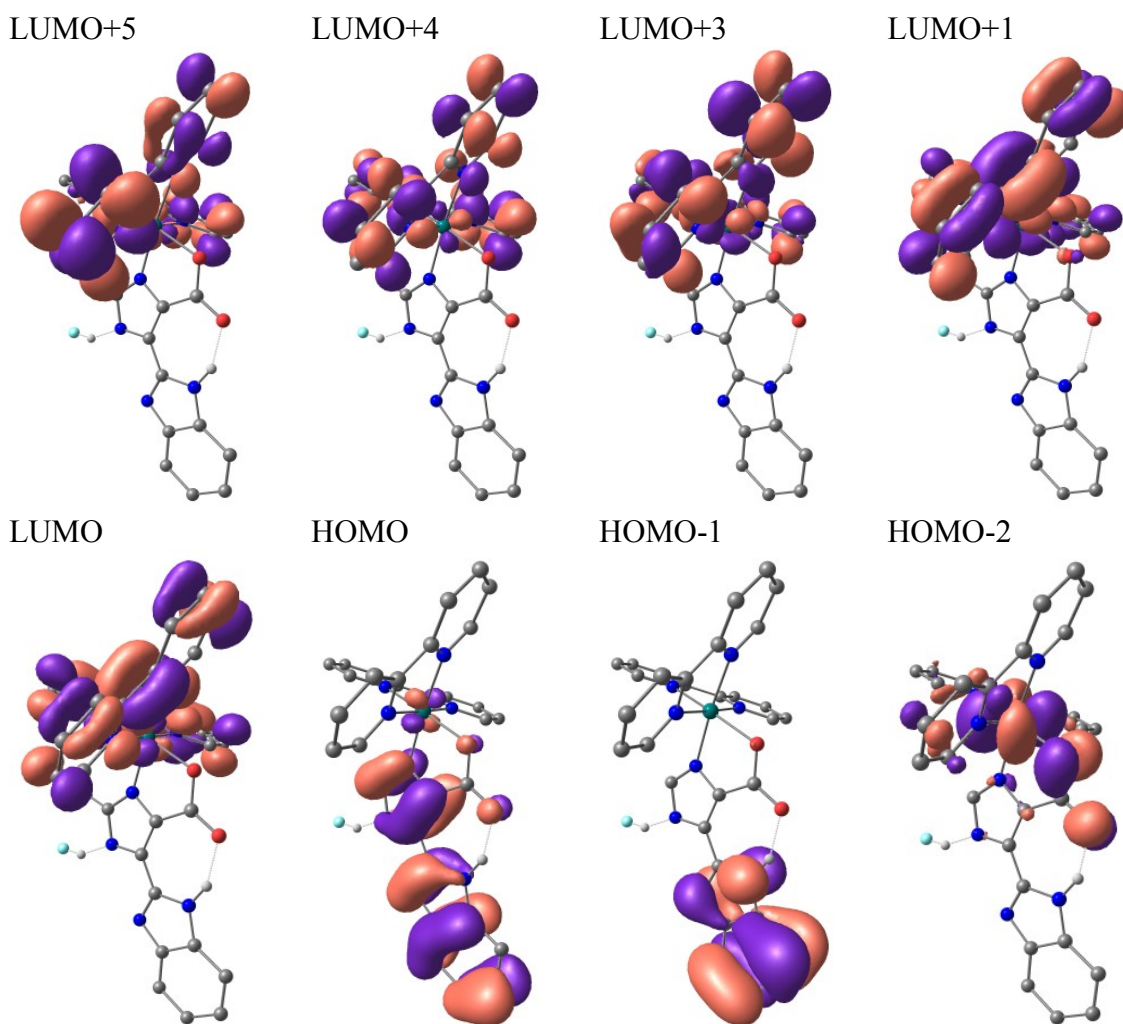

**Fig. S8** Selected molecular orbitals for  $1^+$  with  $F^-$  (A).

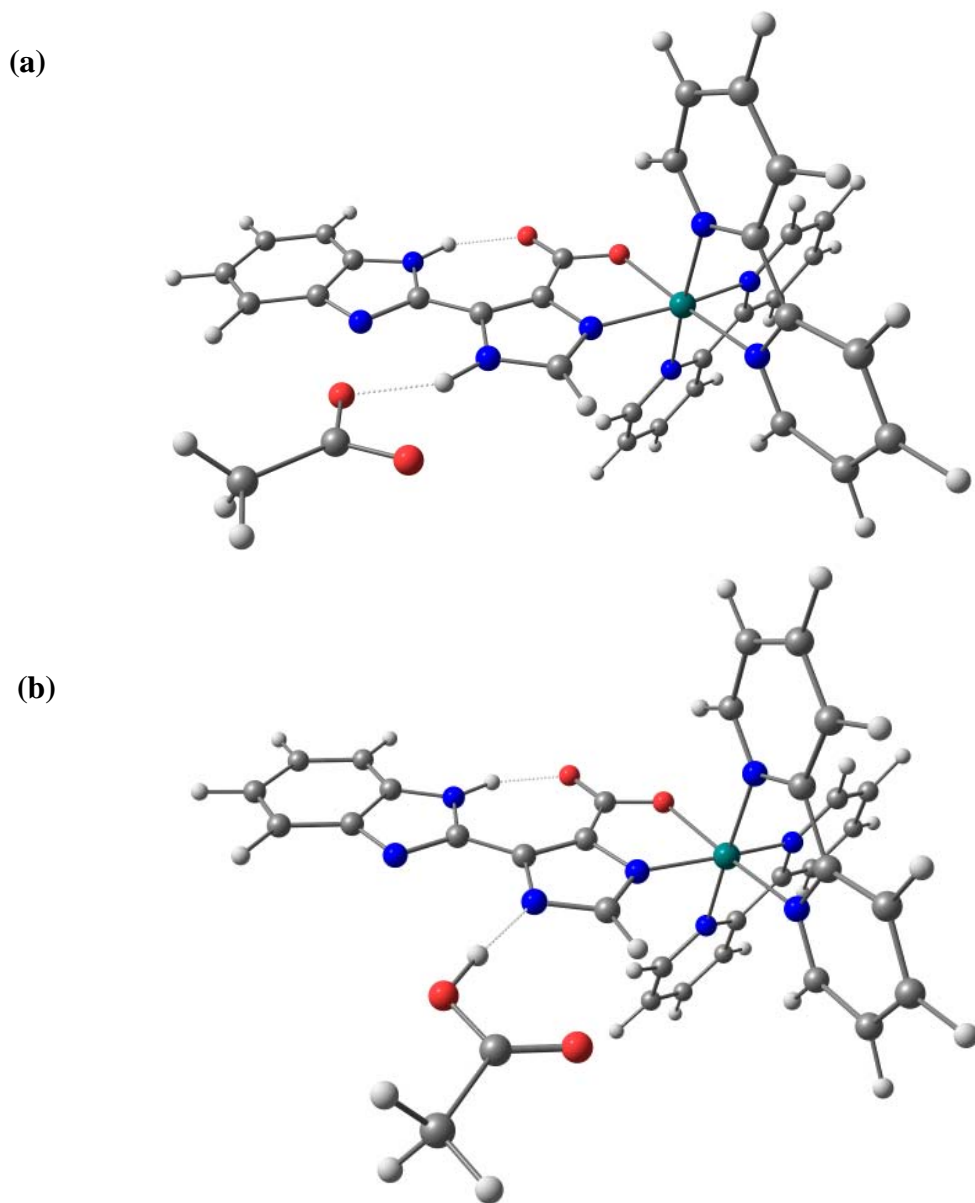

**Fig. S9** Molecular structures of (a) initial **B** and (b) DFT optimised **B**.

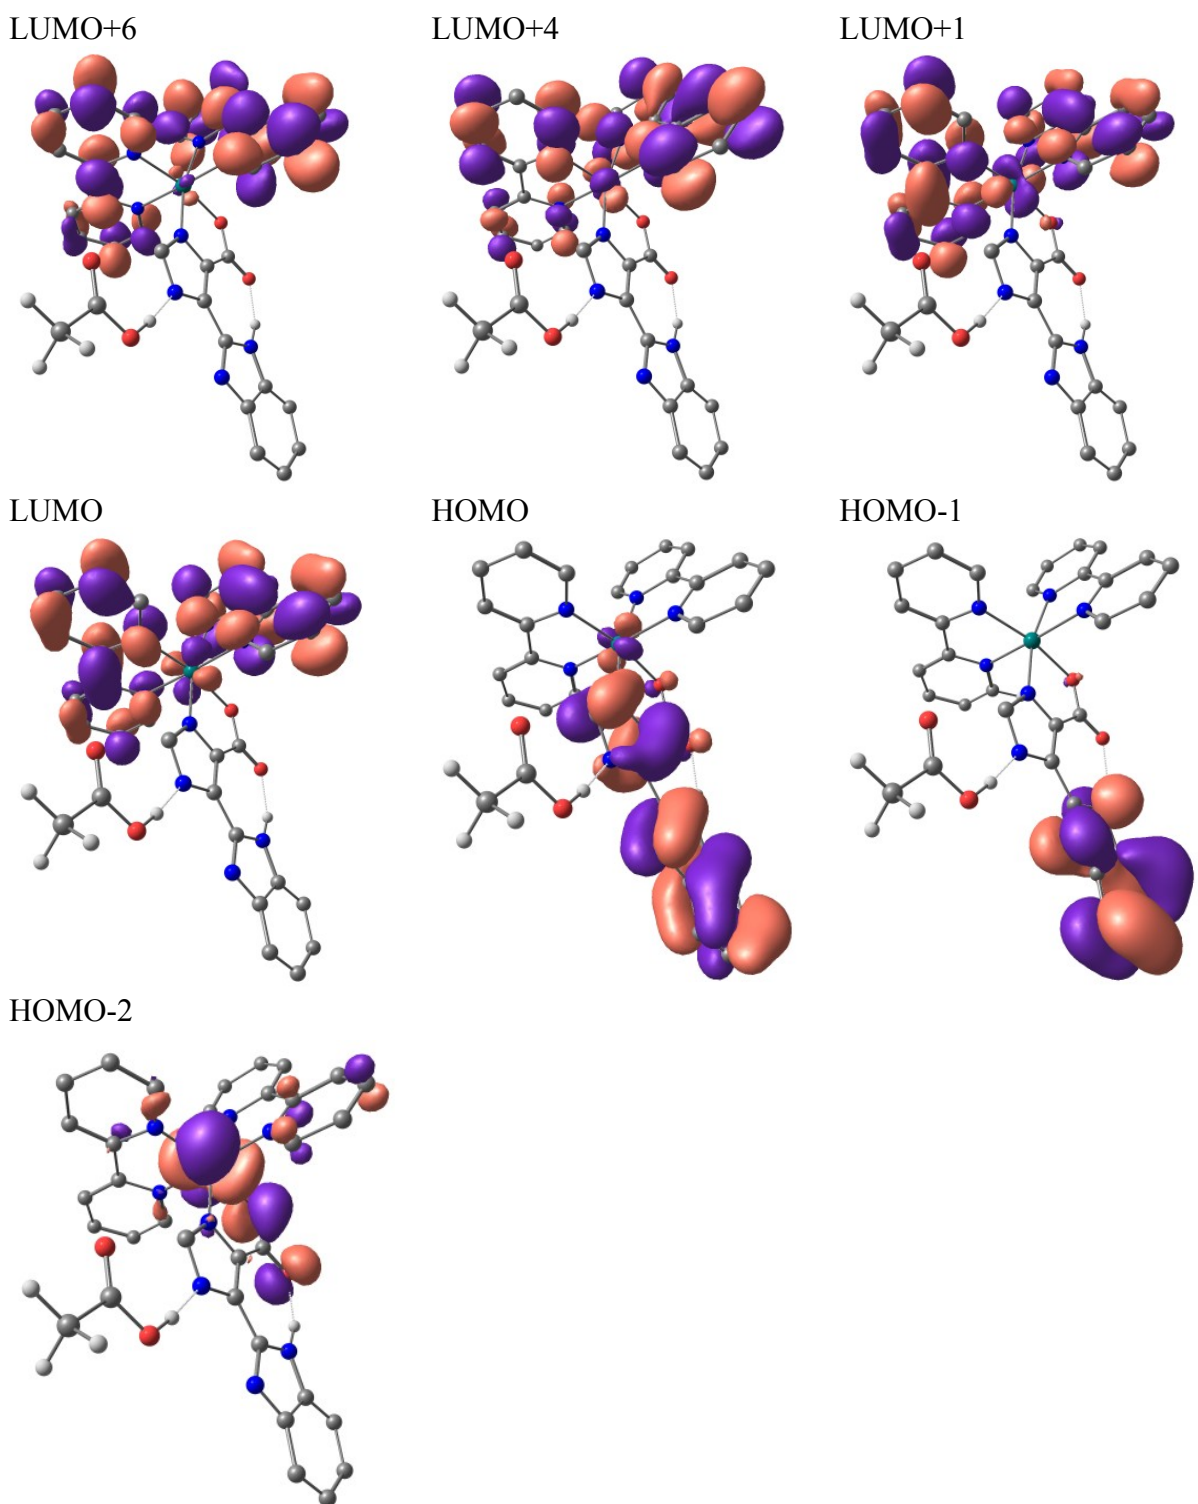

**Fig. S10** Selected molecular orbitals of  $1^+$  with  $\text{OAc}^-$  (**B**).

(a)

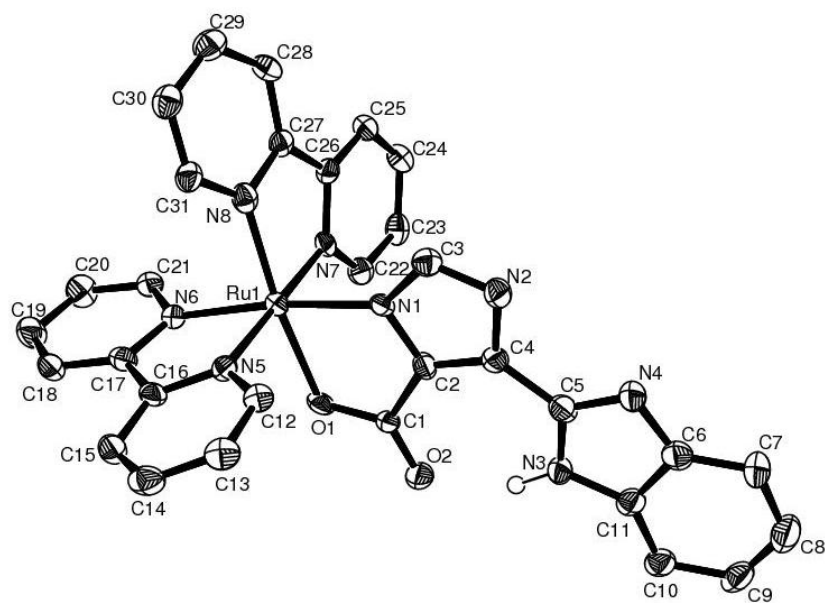

(b)

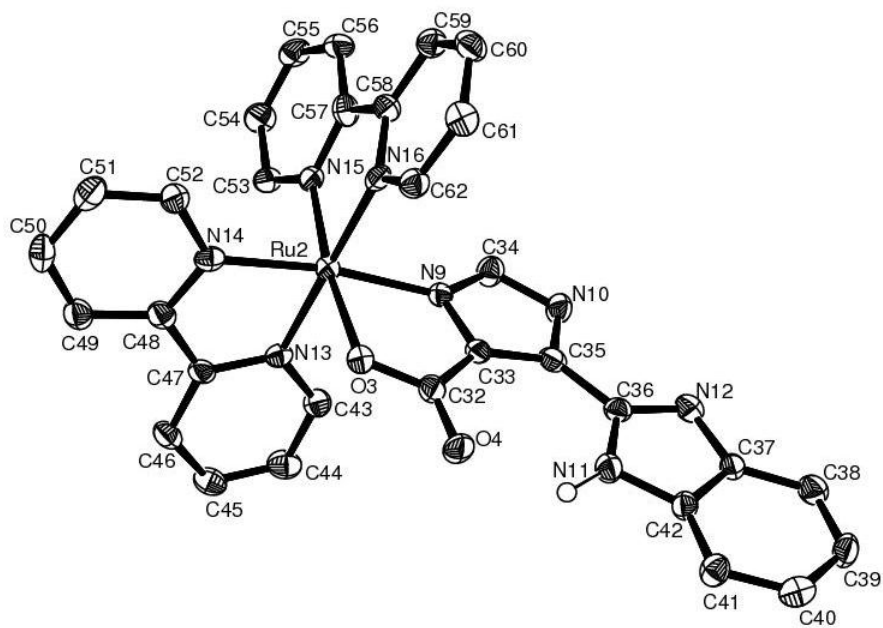

| Intramolecular   |        |          |          |          |
|------------------|--------|----------|----------|----------|
| D-H...A          | d(D-H) | d(H...A) | d(D...A) | ∠D-H...A |
| N3-H3N ...O2 (1) | 0.954  | 1.821    | 2.707    | 153.11   |
| N11-H11N...O4(1) | 1.030  | 1.924    | 2.680    | 127.62   |

(1) x,y,z

**Fig. S11** ORTEP diagram of **1** (two molecules in the asymmetric unit) from the crystal of 2[**1**]. 5CH<sub>3</sub>CN. Ellipsoids are drawn at 50% probability level. Table shows the intramolecular hydrogen bonding parameters.

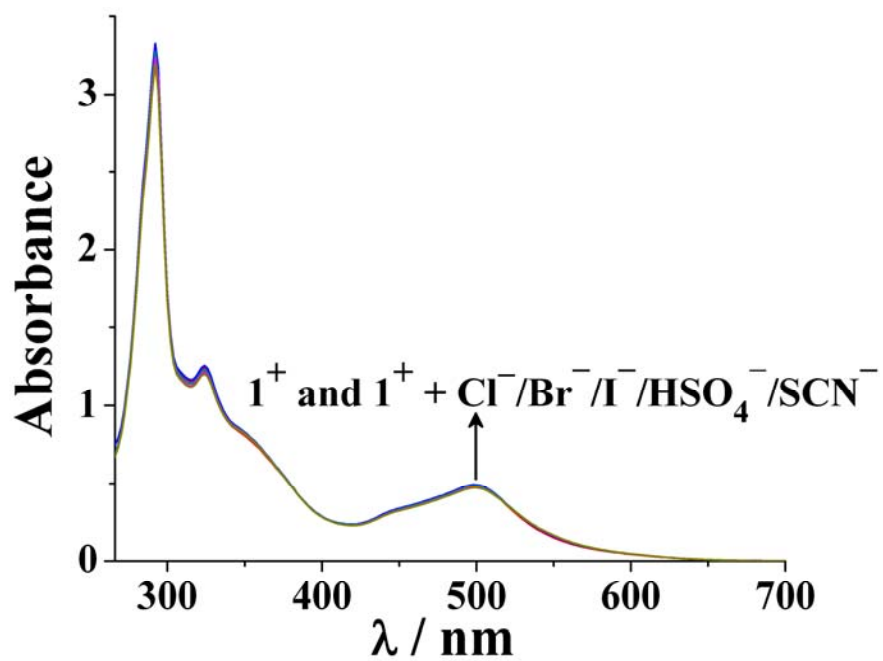

**Fig. S12** Absorption spectra of  $1^+$  ( $5 \times 10^{-5} \text{ mol dm}^{-3}$ ) in  $\text{CH}_3\text{CN}$  and  $1^+$  in presence of one equivalent TBA salts of  $\text{Cl}^-$ ,  $\text{Br}^-$ ,  $\text{I}^-$ ,  $\text{HSO}_4^-$ ,  $\text{SCN}^-$ .

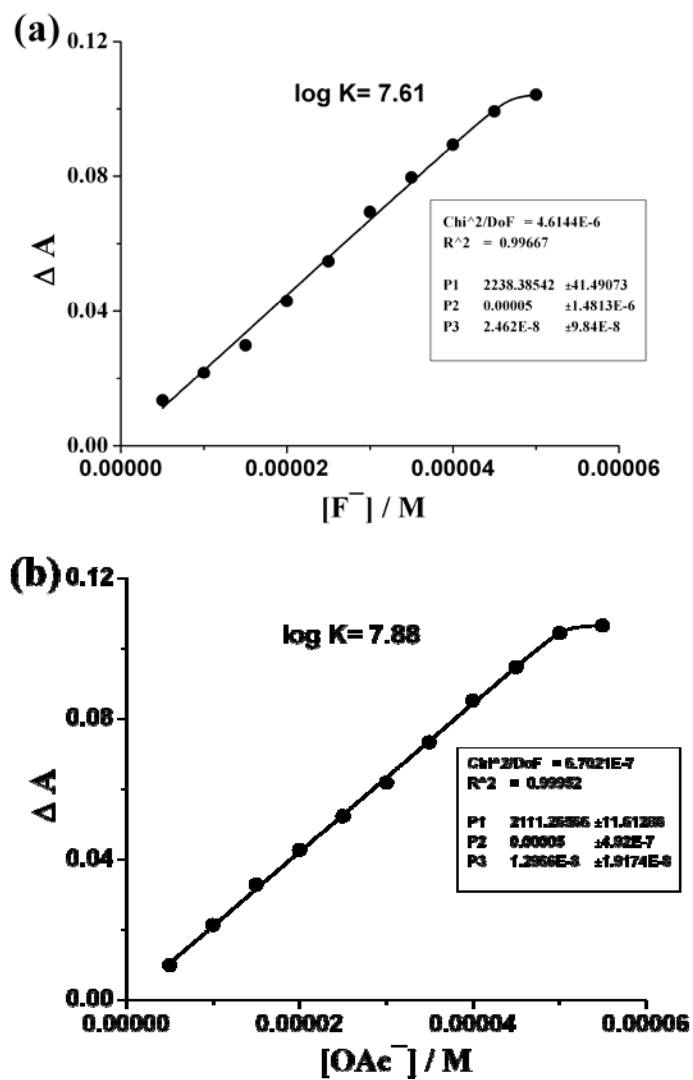

**Fig. S13** Plots represent the change in absorbance ( $\Delta A$ ) of  $CH_3CN$  solution of  $1^+$  at 498 nm in presence of (a)  $F^-$  and (b)  $OAc^-$  versus the concentration of  $F^-$  and  $OAc^-$ , respectively.



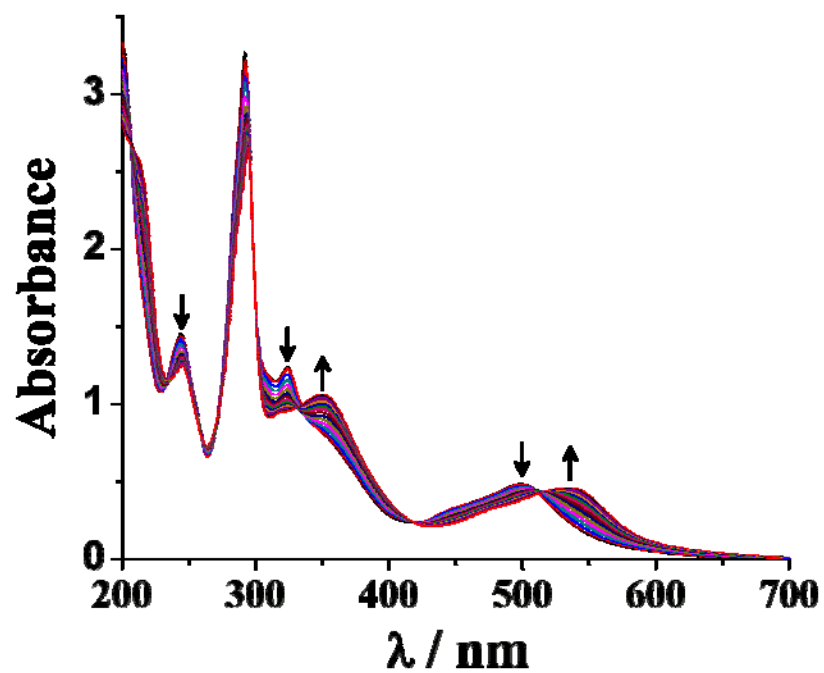

**Fig. S14** Absorption spectral changes of  $1^+$  ( $5 \times 10^{-5} \text{ mol dm}^{-3}$ ) in  $\text{CH}_3\text{CN}$  on gradual additions of 0-3 equivalents of  $[\text{TBA}][\text{H}_2\text{PO}_4]$ .

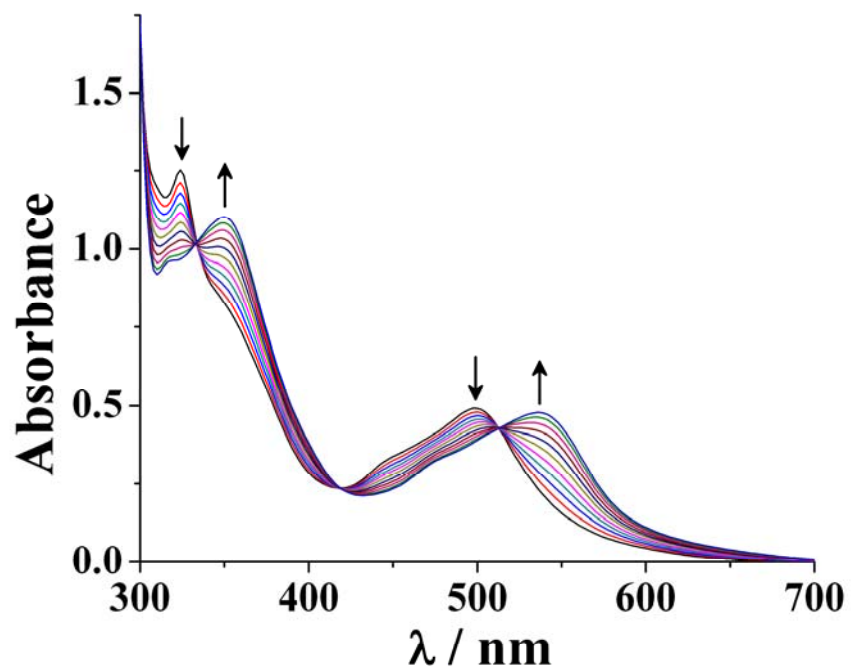

**Fig. S15** Absorption spectral changes of  $1^+$  ( $5 \times 10^{-5} \text{ mol dm}^{-3}$ ) in  $\text{CH}_3\text{CN}$  on gradual additions of 0-1 equivalent of  $[\text{TBA}][\text{OH}]$ .

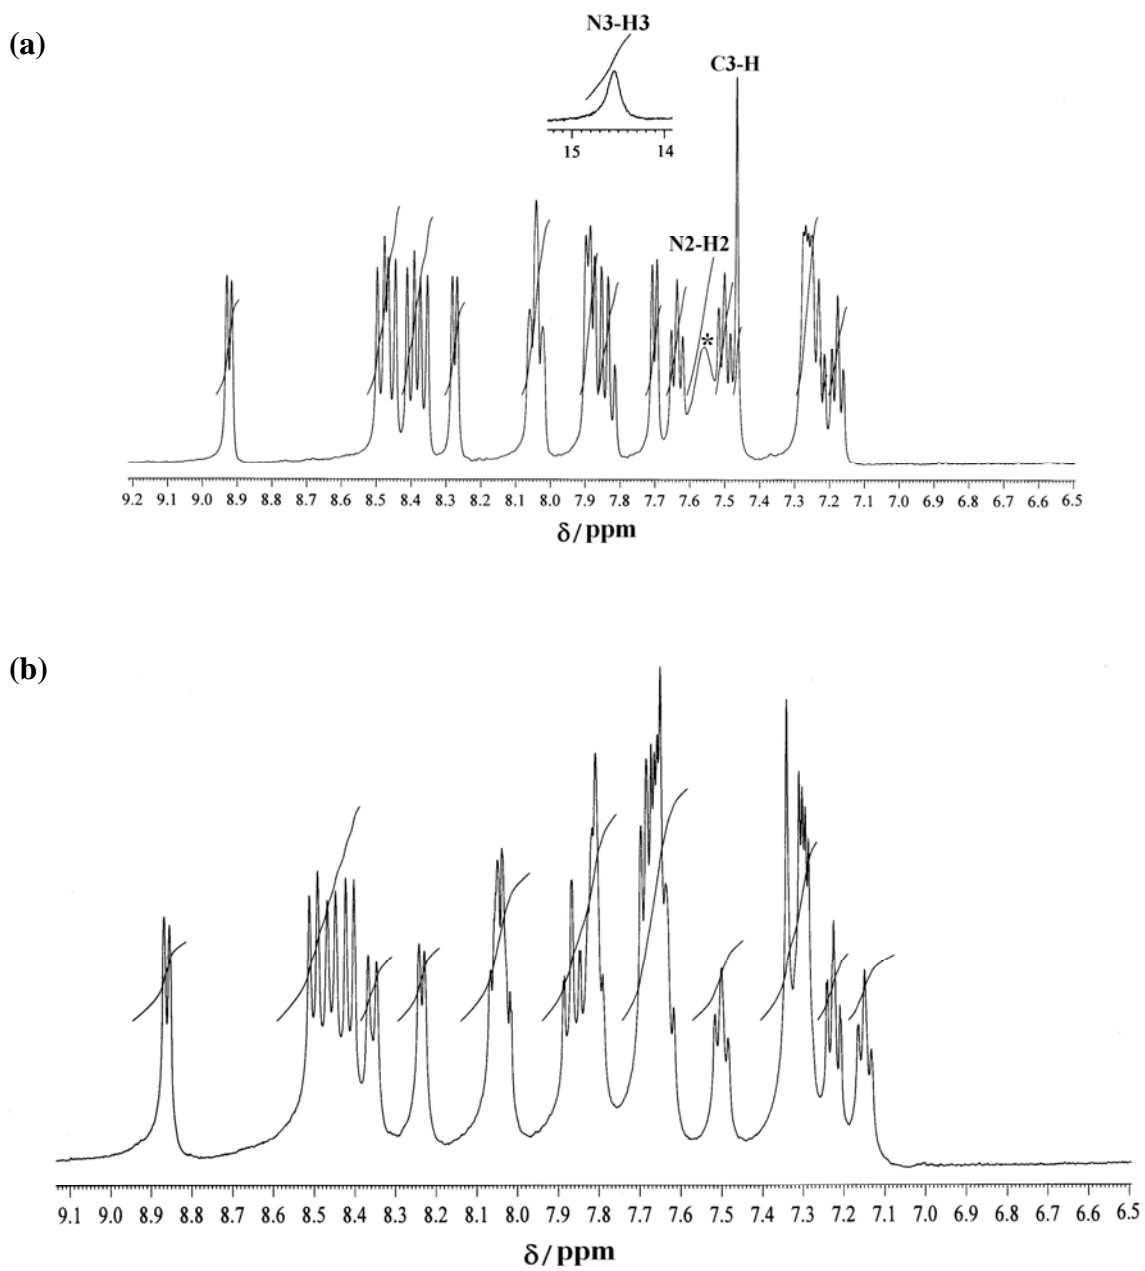

**Fig. S16**  $^1\text{H}$  NMR spectra of (a)  $1^+$  in  $\text{CD}_3\text{CN}$  and (b) in presence of  $\text{D}_2\text{O}$ .

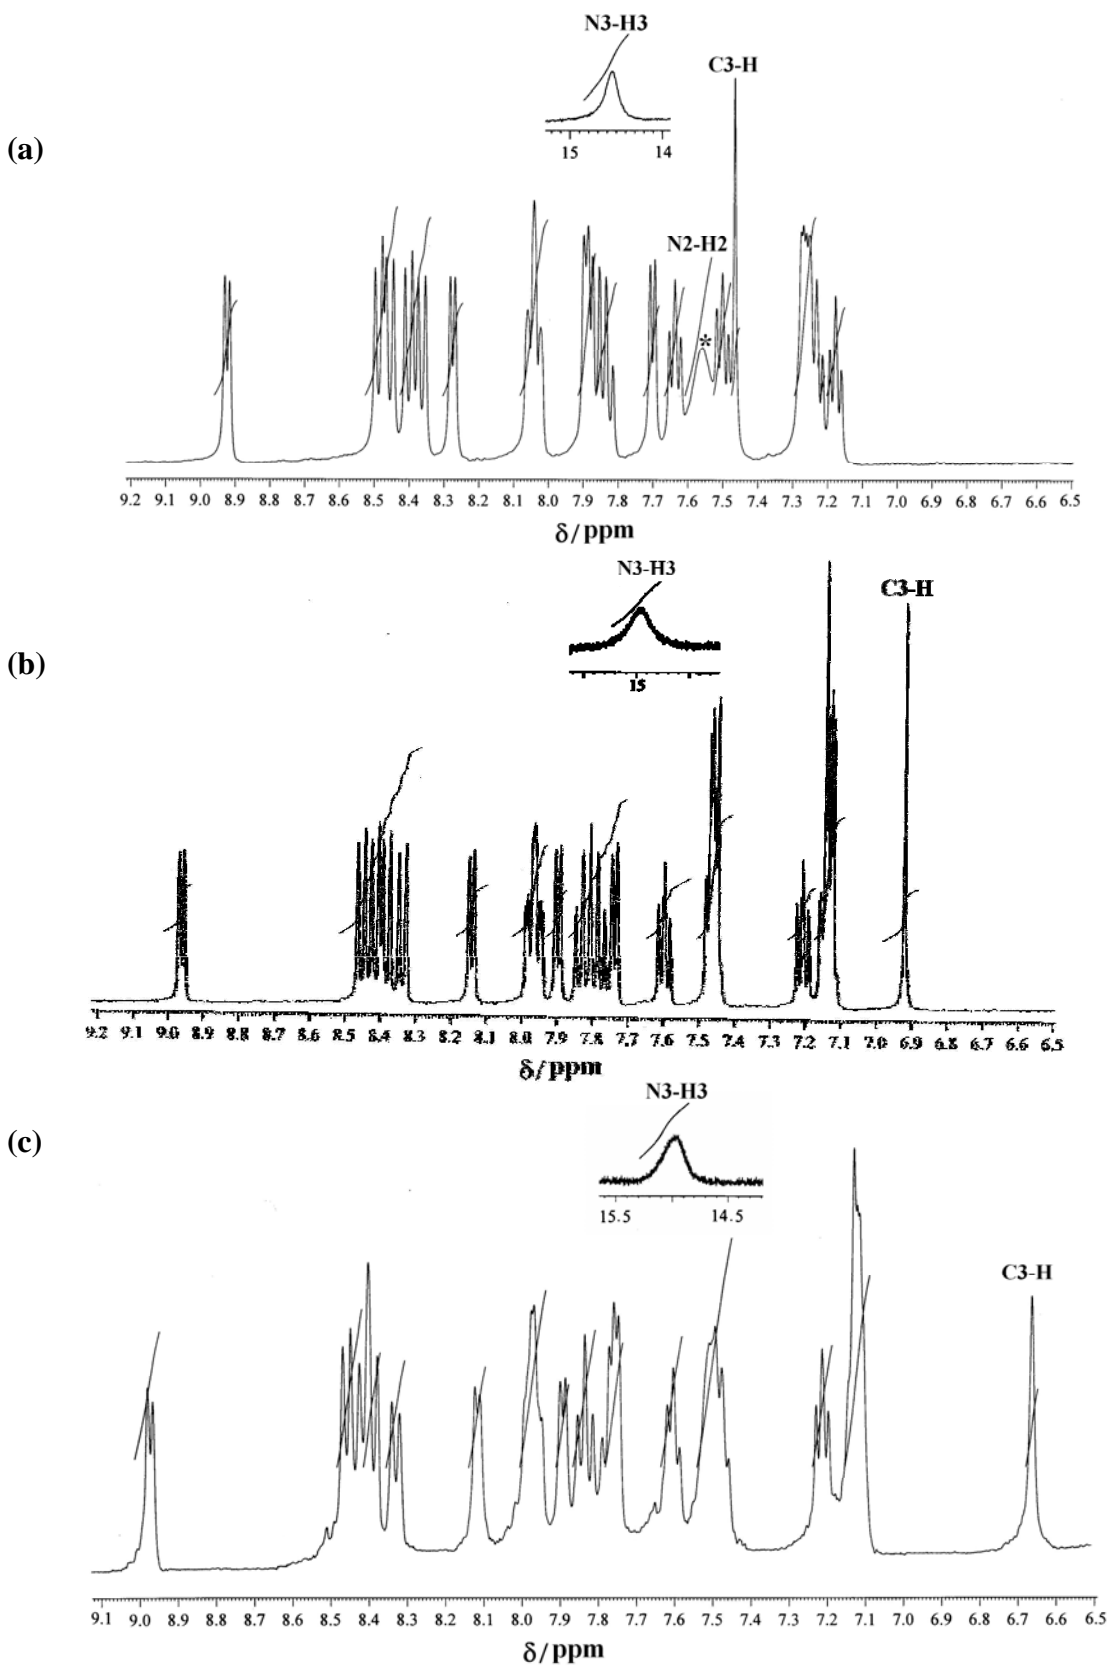

**Fig. S17**  $^1\text{H}$  NMR spectra in  $\text{CD}_3\text{CN}$  of (a)  $1^+$ , (b)  $1^+$  in presence of one equivalent of [TBA][F] and (c)  $1^+$  in presence of one equivalent of [TBA][OAc].

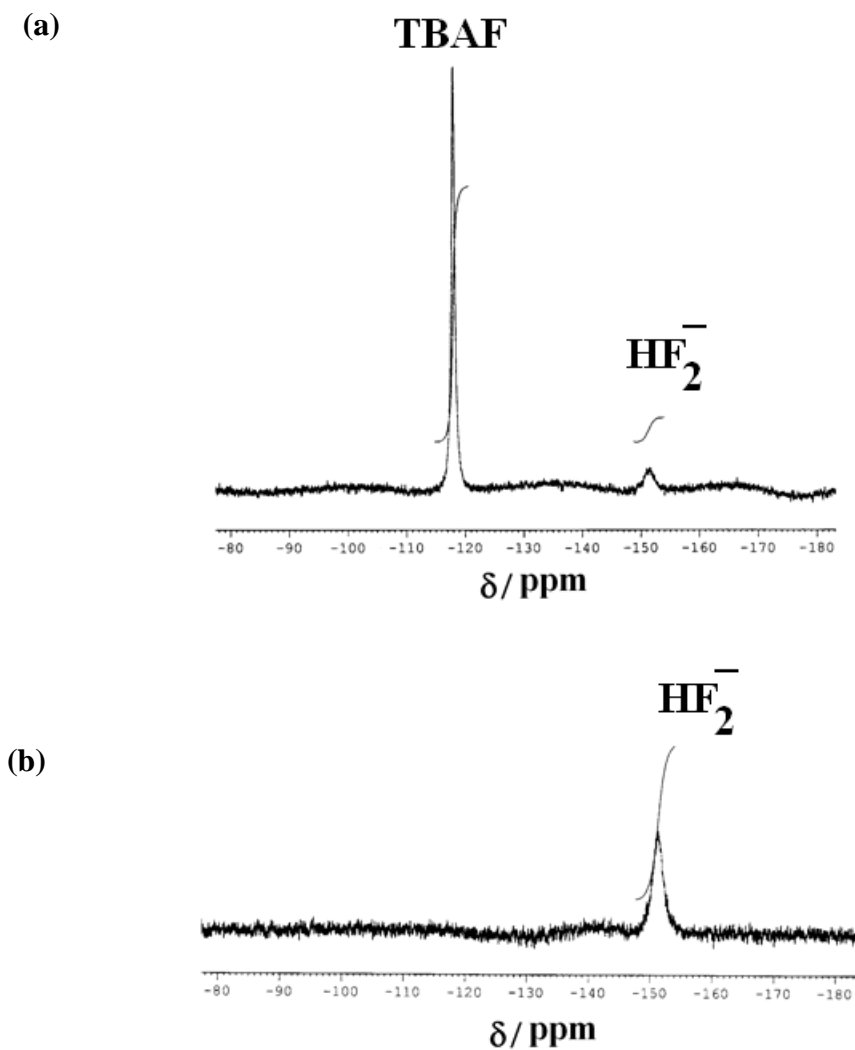

**Fig. S18**  $^{19}\text{F}$  NMR spectra in  $\text{CD}_3\text{CN}$  of (a) TBAF and (b) TBAF in presence of 0.6 equivalent of  $\mathbf{1}^+$ . Trifluoro-toluene is used as an internal standard ( $\delta = -62.23$ ) at 298K.

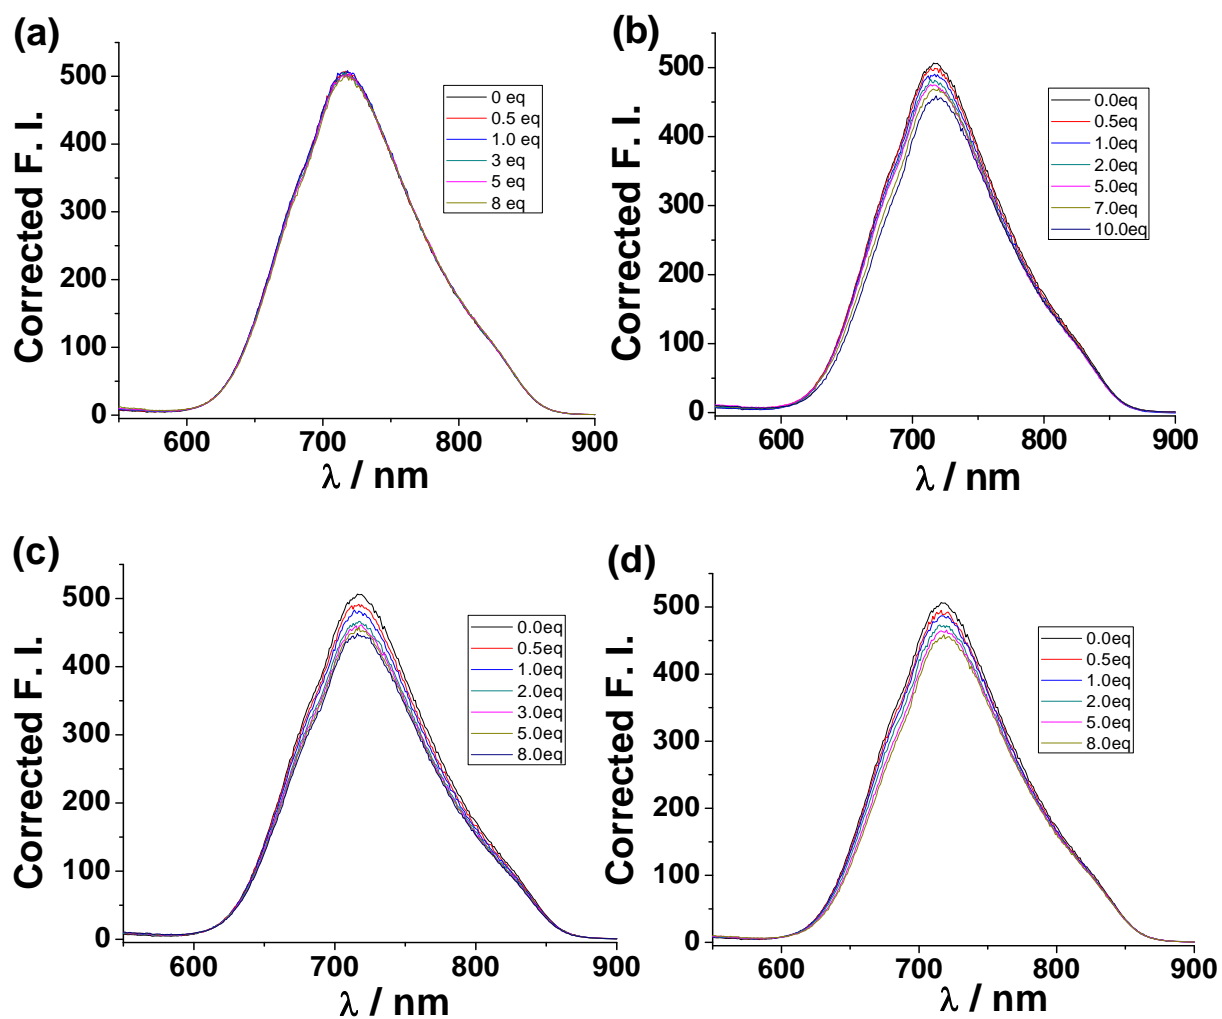

**Fig. S19** Quenching of emission intensity of  $1^+$  during the additions of 0 to 8 equivalents of (a) TBACl, (b) TBABr, (c) TBAI and (d) TBAHSO<sub>4</sub> in CH<sub>3</sub>CN at 298K.

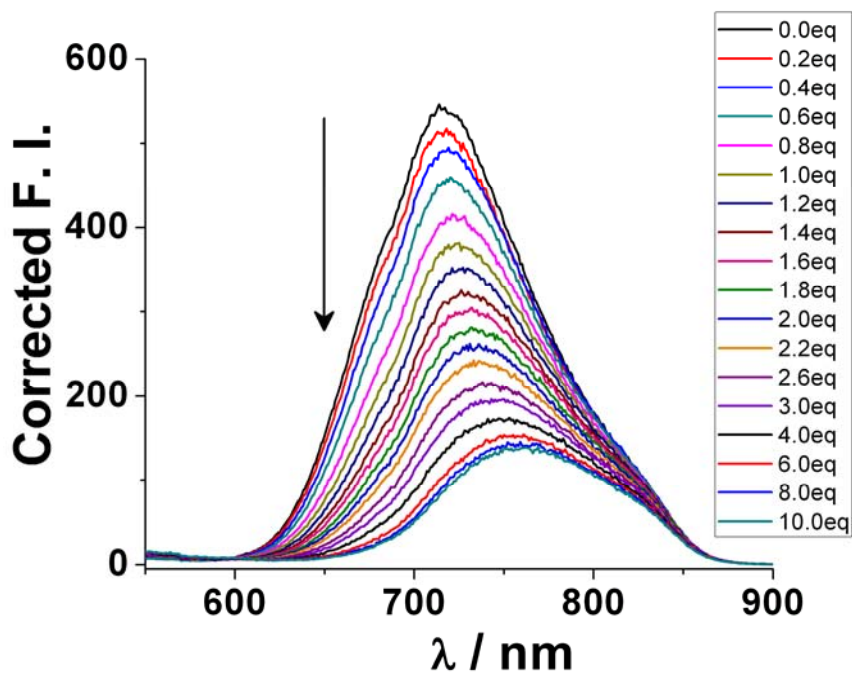

**Fig. S20** Quenching of emission intensity of  $1^+$  during the addition of 0 to 10 equivalents of TBAH<sub>2</sub>PO<sub>4</sub> in CH<sub>3</sub>CN at 298K.

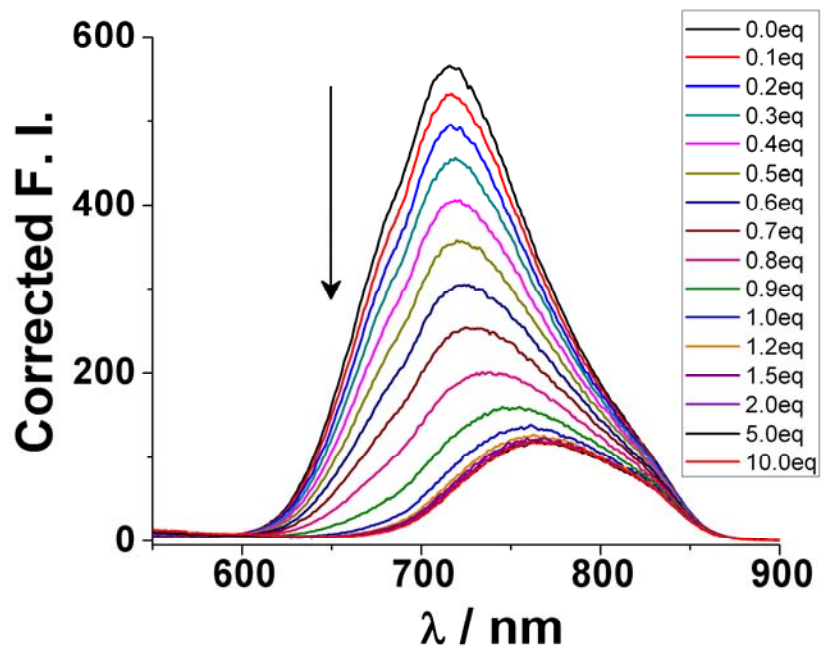

**Fig. 21** Quenching of emission intensity of  $1^+$  during the additions of 0 to 10 equivalents of TBAOH in  $\text{CH}_3\text{CN}$  at 298K.



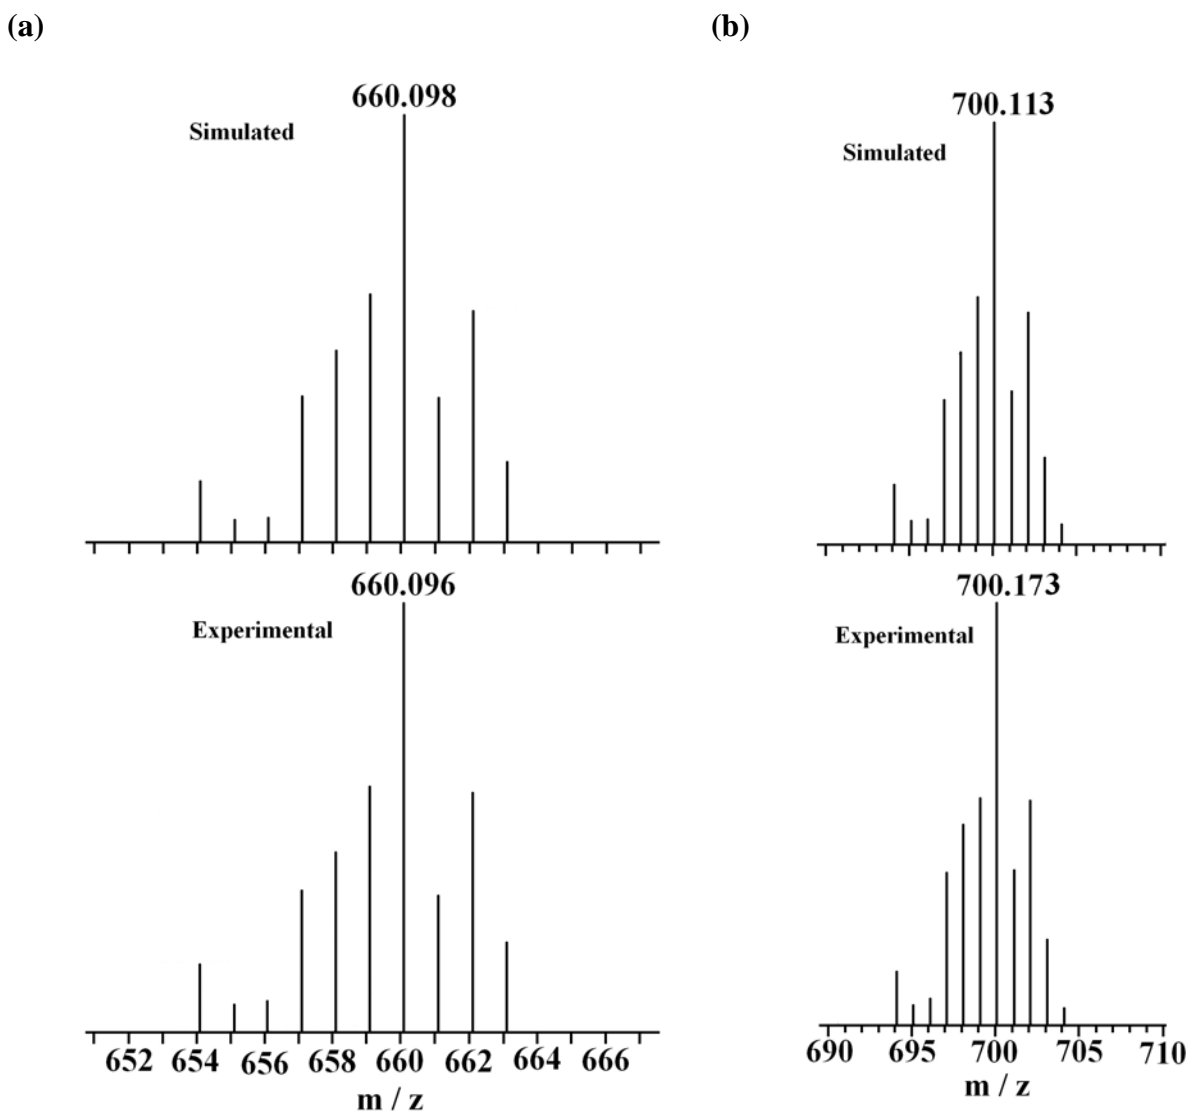

**Fig. S22** The simulated and experimental ESI-MS peaks in  $CH_3CN$  of (a)  $[1^+ \cdot F^-]$  (A) and (b)  $[1^+ \cdot OAc^-]$  (B), in situ generated by the additions of one equivalent of  $[TBA][F]$  and  $[TBA][OAc]$ , respectively, in the solution of  $1^+$ .
